# Supplementary material
Source: PubMed Central journal article supplement (PMC3977252)
Supplement: 1403078111_pnas.201403078SI.pdf [file 1403078111_pnas.201403078SI.pdf]

# Supporting Information

Bansal-Mutalik and Nikaido 10.1073/pnas.1403078111

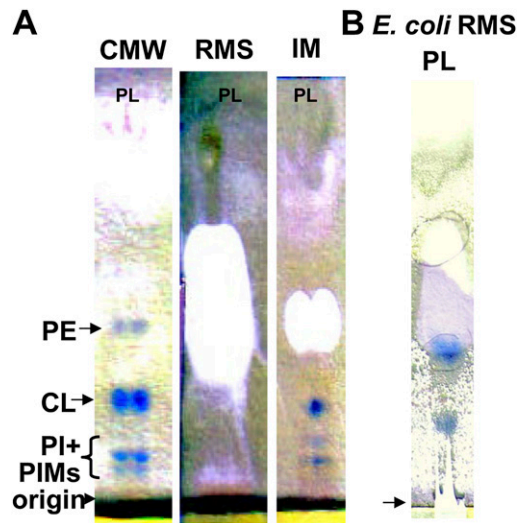

**Fig. S1.** TLC profiles of extracted lipids revealed with phosphospray. TLC was developed with chloroform–methanol–water (CMW) (30:8:1). “CMW” and “RMS” indicate CMW and reverse micellar solution (RMS) extracts of intact cells, whereas “IM” indicates CMW extract of residues of RMS-extracted cells. (A) TLC of *Mycobacterium smegmatis* lipids shows the absence of phospholipids (PLs) in the RMS extract [outer membrane (OM) lipids], all of them being present in the inner plasma membrane (IM) extract. (B) TLC of the RMS extract of *Escherichia coli* sprayed with phosphospray shows the presence of PLs in its OM.
